RESEARCH ARTICLE

# An integrated analysis of mRNA and sRNA transcriptional profiles in tomato root: Insights on tomato wilt disease

Min Zhao<sup>1</sup>\*, Hui-Min Ji<sup>1</sup>\*, Ying Gao<sup>1</sup>, Xin-Xin Cao<sup>1</sup>, Hui-Ying Mao<sup>1</sup>, Shou-Qiang Ouyang<sup>1,2\*</sup>, Peng Liu<sup>3\*</sup>

**1** College of Horticulture and Plant Protection, Yangzhou University, Yangzhou, Jiangsu, China, **2** Joint International Research Laboratory of Agriculture and Agri-Product Safety, Yangzhou University, Yangzhou, Jiangsu, China, **3** Texting Center, Yangzhou University, Yangzhou, Jiangsu, China

\* These authors contributed equally to this work.

\* [oysq@yzu.edu.cn](mailto:oysq@yzu.edu.cn) (SQO); [pengliu@yzu.edu.cn](mailto:pengliu@yzu.edu.cn) (PL)

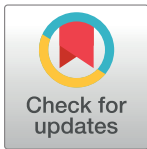

**OPEN ACCESS**

**Citation:** Zhao M, Ji H-M, Gao Y, Cao X-X, Mao H-Y, Ouyang S-Q, et al. (2018) An integrated analysis of mRNA and sRNA transcriptional profiles in tomato root: Insights on tomato wilt disease. PLoS ONE 13(11): e0206765. <https://doi.org/10.1371/journal.pone.0206765>

**Editor:** Zhulong Chan, Huazhong Agriculture University, CHINA

**Received:** August 4, 2018

**Accepted:** October 18, 2018

**Published:** November 5, 2018

**Copyright:** © 2018 Zhao et al. This is an open access article distributed under the terms of the [Creative Commons Attribution License](https://creativecommons.org/licenses/by/4.0/), which permits unrestricted use, distribution, and reproduction in any medium, provided the original author and source are credited.

**Data Availability Statement:** All relevant data are within the paper and its Supporting Information files. Additionally, all raw data of sequencing were deposited at <https://www.ncbi.nlm.nih.gov/bioproject/PRJNA407898>.

**Funding:** This work was supported by grant of Science Foundation of Jiangsu Province: BK20161330, Jiangsu Province, China.

**Competing interests:** The authors have declared that no competing interests exist.

## Abstract

Tomato wilt disease caused by *Fusarium oxysporum* f. sp. *lycopersici* (FOL) is a worldwide destructive disease of tomato. As exploring gene expression and function approaches constitute an initial point for investigating pathogen-host interaction, we performed RNA-seq and sRNA-seq analysis to investigate the transcriptome of tomato root under FOL infection. Differentially expressed (DE) protein-coding gene and miRNA gene profiles upon inoculation with FOL were presented at twenty-four hours post-inoculation in four treatments. A total of more than 182.6 million and 132.2 million high quality clean reads were obtained by RNA-seq and sRNA-seq, respectively. A large overlap was found in DE mRNAs between susceptible cultivar Moneymaker and resistant cultivar Motelle. Gene Ontology terms were mainly classified into catalytic activity, metabolic process and binding. Combining with qRT-PCR and Northern blot, we validated the transcriptional profile of five genes and five miRNAs conferred to FOL infection. Our work allowed comprehensive understanding of different transcriptional reaction of genes/miRNAs between the susceptible and resistant cultivars tomato to the FOL challenge, which could offer us with a future direction to generate models of mediated resistance responses.

## Introduction

*Fusarium oxysporum* f. sp. *lycopersici* (race 2) (as FOL in this study) is a necrotrophic pathogen which is the causal agent of tomato wilt disease worldwide [1, 2]. Under appropriate conditions, FOL infection leads to clogged vessels resulting in yellowing of leaves, wilting and finally death of the whole plant. According to their specific pathogenicity to tomato cultivars, three physiological races of FOL were distinguished [1, 2].

Tomato (*Solanum lycopersicum*) is a worldwide agriculture economic crop and also has been studied as a crucial model plant for studying the genetics and molecular basis of resistance mechanisms. Four plant resistance (*R*) genes have been introgressed from wild tomato species

including the *I* (or *I-1*) and *I-2* from *S. pimpinellifolium*, and the *I-3* and *I-7* from *S. pennellii*. Among these *R* genes, so far, *I-2*, *I-3* and *I-7* have been cloned, encoding an NBS-LRR protein like most known *R* genes [3–6]. Previous works have unveiled that the *I-2* and *I-3* conferred resistance to race 2 and race 3 strains of FOL, respectively [4, 5]. The *I-2* locus encodes an *R* protein that recognizes Avr2 effector protein from FOL (race 2) [7]. The *I-3* encodes an S-receptor-like kinase (SRLK) that confers Avr3-dependent resistance to FOL (race 3) [5]. Two near-isogenic tomato cultivars susceptible MoneyMaker (*i-2/i-2*) and resistant Motelle (*I-2/I-2*) were recruited to study the interaction between tomato and FOL [1, 8, 9].

Basically, transcriptome analysis is a very important tool to discover the molecular basis of plant-pathogen interaction globally, allowing dissection of the pattern of pathogen activities and molecular repertoires available for defense responses in host plant. By taking advantage of RNA-seq technology, certain number of transcriptome profiling studies of plants inoculated by *Fusarium* fungus have been presented including banana [10], cabbage [11], watermelon [12], mango [13], and *Arabidopsis* [14, 15].

MicroRNAs (miRNAs) (20–24 nucleotides in length) are derived from endogenous single-stranded non-coding small RNAs with imperfectly base-paired hairpin structures, which regulate gene expression at the post-transcriptional level via base-pairing cleavage, or the translational level in complex with Argonaute proteins by repression the target mRNAs [16–19]. To date, a few of studies have demonstrated that miRNAs play critical roles in various biotic and abiotic stress responses, especially stress responses [20, 21] and innate immunity [22–24]. MiRNAs might confer pathogen response by regulating plant hormonal network, such as auxin, jasmonic acid (JA), ethylene (ET), as well as salicylic acid (SA)-mediated defense. For example, miR393 targets the AFB/TIR1 leading to enhance an accumulation of pathogen-resistant protein [25, 26]. Our previous study showed that two miRNAs, sly-miR482f and sly-miR5300, along with several *NBS-LRR* (or like) genes, were verified to play a crucial role in response to FOL infection in tomato [27, 28]. However, there is far less attention to understand how genes and miRNAs were integrated into the dynamic and complex regulatory network resulting in the enhancement of resistance to FOL in tomato.

Beyond the importance of the tomato wilt disease caused by FOL, the knowledge of tomato reprogramming under the onset of wilt disease still remains unknown. The object of this study is to explore transcriptional changes in MoneyMaker (susceptible) and Motelle (resistant) isogenic tomato cultivars infected by FOL. In addition to genes prediction, our results also uncovered a bunch of FOL-responsive miRNAs in tomato for further functional characterization, which would provide a broader view of the dynamics of tomato defense triggered by FOL infection.

## Materials and methods

### Tomato materials and fungal culture

Susceptible cultivar MoneyMaker (*i-2/i-2*) and resistant cultivar Motelle (*I-2/I-2*) were applied for plant infection and libraries construction in this study. Tomato seedlings were grown at 25°C with a 16/8-h light/dark cycle for two weeks. The wild-type FOL (race 2) strain is FGSC 9935 (known as FOL 4287 or NRRL 34936). Tomato seedlings were removed from soil and roots were rinsed with running water gently followed by incubating in the solution of FOL conidia at a concentration of  $1 \times 10^8$  conidia/ml for 30 minutes. Water treated tomato seedlings were used as the control. Forty seedlings were used for each treatment. All treated tomato seedlings were then transferred to pots containing vermiculite and placed in a growth chamber at 25°C for 24 hours (16-hour light, 8-hour dark) as described previously [25]. After infection, clean roots were collected and immediately frozen in liquid nitrogen for total RNA extraction.

In order to minimize experimental variations, all root samples were collected in three independently repeated experiments.

### RNA extraction, library preparation, and sequencing

Total RNA was isolated from roots using TRIzol Reagent (#15596026, Life Technologies, CA, USA) as described previously [27]. For each sample, all roots from three biological repeats were pooled together for total RNA extraction.

For mRNA library construction, after the total RNA extraction followed by DNase I treatment, mRNA was enriched by magnetic beads with Oligo (dT). The mRNA was sheared into short fragments in the fragmentation buffer. Then cDNA was synthesized using the mRNA fragments as templates. cDNAs were purified and resolved with elution buffer for end reparation and single nucleotide A (adenine) addition followed by adding adapters to cDNAs. After agarose gel electrophoresis, the suitable cDNAs were selected for the PCR amplification as templates. During the quality control (QC) steps, Agilent 2100 Bioanalyzer and ABI StepOne-Plus Real-Time PCR System were used in quantification and qualification of the sample library. The libraries were sequenced using Illumina HiSeq<sup>TM</sup> 2000.

For sRNA library construction, 1  $\mu$ g of total RNA were used for small RNA library generation. Briefly, total RNA samples were separated using polyacrylamide gel electrophoresis (PAGE), and cut out between 18 and 30 nt stripe to recover small RNA. 3' and 5' adapter were ligated at both ends, followed by reverse transcribed with Superscript II Reverse transcriptase using adapter-specific RT-primers. PCR products were then gel purified to enrich special fragments. The quality control (QC) steps were described as above. The purified high-quality cDNA library was sequenced using Illumina Genome HiSeq4000.

### Bioinformatics analysis of RNA-seq and sRNA-seq

Primary sequencing data that produced by Illumina HiSeq<sup>TM</sup> 2000/HiSeq4000, called as raw reads, were subjected to quality control (QC). The QC alignment data was utilized to calculate distribution of reads on reference genes and mapping ratio. After QC, raw reads were filtered into clean reads which were aligned to the reference sequences [29–31].

For RNA-seq, the clean reads were then aligned to the tomato reference genome downloaded from the Sol Genomics Network using Bowtie v0.12.5 [29] and TopHat v2.0.0 [31, 32] with default settings. Transcript abundance was calculated with Cufflinks v0.9.3 [32] based on fragments per kilo base of transcript per million fragments mapped (FPKM) under default parameters settings. The transcript abundance was calculated for individual sample files followed further merged pairwise for each comparison (FOL treatment versus water treatment for each cultivar) using Cufflinks utility program-Cuffmerge [31]. The pairwise comparisons of gene expression profiles between the two populations were done using the Cuffdiff program of the Cufflinks version 1.3.0 [32]. The genes were considered significantly differentially expressed if  $\log_2$  FPKM (fold change) was  $\geq 1.0$  and false discovery rate (FDR, the adjusted P value) was  $< 0.01$ . The q-value which was a positive FDR analogue of the p-value was set to  $< 0.01$  [33].

For sRNA-seq, the sequence data were subsequently processed using in-house software tool SeqQC V2.2. House-keeping small RNAs including tRNAs, rRNAs, snoRNAs and snRNAs were removed by blasting in GenBank (<http://www.ncbi.nih.gov/Genbank>) servers. The trimmed reads were then aligned to the tomato reference genome downloaded from <http://www.mirbase.org> (miRBase 21.0) and <http://www.ncbi.nlm.nih.gov> using Bowtie v0.12.5 (<http://www.bioinfogp.cnb.csic.es/tools/venny/index.html>) and TopHat v2.0.0 [34] with default settings. To identify known miRNAs, the remaining unique small RNA sequences were then aligned against the miRBase 21.0 allowing maximum one mismatch. After assigning the

known miRNA sequences into their respective groups or families, rest of the sequences were checked for novel miRNAs.

### Functional categorization of DEGs

DEGs were functionally categorized online for all pairwise comparisons according to the Munich Information Center for Protein Sequences (MIPS) functional catalogue [34]. The functional categories and subcategories were regarded as enriched in the genome if an enrichment p-value was below  $<0.05$ . The Kyoto Encyclopedia of Genes and Genomes (KEGG) pathway analyses were performed using interface on blast2GO (Blast2GO v2.6.0, <http://www.blast2go.com/b2ghome>) for all DEGs to identify gene enrichment on a specific pathway.

### Gene ontology (GO) and pathway enrichment analysis

Gene Ontology (GO) and pathway enrichment were performed using DAVID software. Graphs of the top 20 enriched GO terms for each library were generated using the Cytoscape Enrichment Map plugin [35, 36].

### Quantitative RT-PCR (qRT-PCR) and Northern blot analysis

Quantitative RT-PCR (qRT-PCR) and Northern blot analysis were performed according to our previous protocol [27]. Briefly again, expression of DEGs were determined using qRT-PCR. cDNAs were generated from 1  $\mu\text{g}$  of total RNA using the SMART MMLV Reverse Transcriptase (Takara, Mountain View, CA) followed by diluting two times and using as template for qRT-PCR, which was performed with the CFX96 real-time PCR system (Bio-Rad, Hercules, California, USA). Primers used for qRT-PCR were designed from 3-UTR for individual gene. Each reaction mixture (20  $\mu\text{L}$ ) contained 1  $\mu\text{L}$  of cDNA template, 10  $\mu\text{L}$  of SYBR1 Green PCR Master Mix (Applied Biosystems, Foster, CA) and 1  $\mu\text{L}$  of each primer (10  $\mu\text{M}$ ). For each cDNA sample, three replications were performed. The level of 18S rRNA was used as internal control for normalize the expression level of selected genes, and were calculated as the fold change by comparison between in FOL treated and water in treated samples.

To Northern blot analysis, 10  $\mu\text{g}$  total RNA was resolved on urea denaturing polyacrylamide gels (Urea-PAGE). MiRNA-specific oligonucleotide probes were end-labeled using  $\gamma$ - $^{32}\text{P}$ -ATP (#M0201, New England Biolabs, Ipswich, MA). Gel staining with ethidium bromide was used as the loading control. All blots were imaged by PhosphorImager (GE Life Sciences, Pittsburgh, PA, USA). The images were cropped and adjusted with brightness and contrast in Photoshop CS6 from original digital images.

### Statistical analyses

All data in this study were analyzed with ANOVA program or Student's t-test analysis using SPSS 11.5 (SPSS Company, Chicago, IL) for statistical analysis.

## Results

### Post inoculation phenotype in Moneymaker and Motelle

We recruited tomato cultivars susceptible Moneymaker (*i-2/i-2*) and resistant Motelle (*I-2/I-2*) genotypes. Four weeks after FOL infection, Moneymaker plants exhibited severe wilting symptoms, conversely, Motelle plants displayed strong resistance to FOL infection (Fig 1A). We generated four libraries for RNA-seq and sRNA-seq respectively, including Moneymaker treated with FOL/water (MM\_FOL/MM\_H<sub>2</sub>O), Motelle treated with FOL/water (Mot\_FOL/Mot\_H<sub>2</sub>O). Therefore, totally four libraries were constructed. After treating

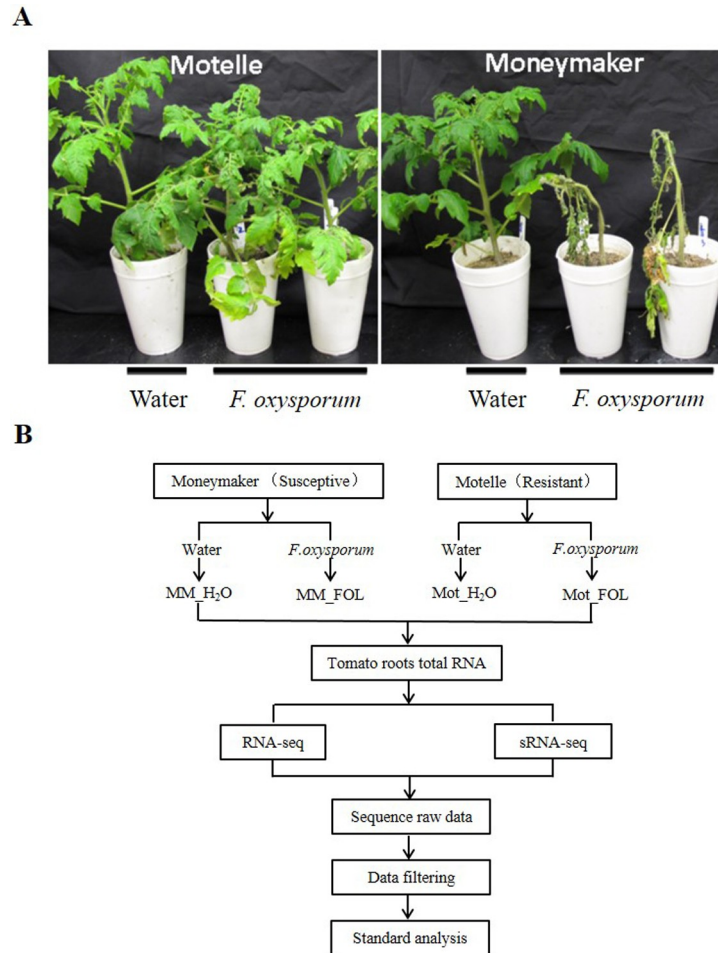

**Fig 1. Post inoculation phenotype in susceptible cultivar Moneymaker and resistant cultivar Motelle.** A The phenotype of tomato seedlings infected by FOL. Two-week-old tomato seedlings were treated with FOL or water followed by photographing four weeks later. B Briefly mRNA and miRNA detection workflow.

<https://doi.org/10.1371/journal.pone.0206765.g001>

with FOL/water, total RNA from tomato roots were extracted for both RNA-seq and sRNA-seq. A briefly mRNA and miRNA detection workflow was presented to summarize the method utilized in this study (Fig 1B).

### General features of mRNA and miRNA sequencing data mapping and annotation

A total of more than 182.6 million high quality clean reads were collected by RNA-seq from four libraries. The sequencing yielded ~46 million clean reads from each library respectively. The clean reads were then bowtied and tophated to the *Solanum lycopersicum* genome using the Tomato Genome assembly (SL3.0) and annotations (ITAG3.0) ([www.solgenomics.net/](http://www.solgenomics.net/)). Approximately three fourths of the total Illumina reads perfectly matched the genome or gene and were used for further analysis. Analysis of the expressed transcripts in the libraries showed that almost equal number of transcripts were observed by ~23 million in four libraries (Table 1). We used Cufflink to measure the expression level of tomato annotated genes. Among these transcripts, 21,189 (86.4%) genes were expressed in all four libraries. Moreover,



**Table 1. Summary of RNA-seq and sRNA-seq datasets from four libraries.**

|                      | Annotation                  | MM_H <sub>2</sub> O | MM_FOL     | Mot_H <sub>2</sub> O | Mot_FOL    |
|----------------------|-----------------------------|---------------------|------------|----------------------|------------|
| RNA-seq              | Clean reads                 | 45,616,330          | 45,635,428 | 45,680,034           | 45,661,734 |
|                      | Genome map rate             | 75.49%              | 67.89%     | 75.87%               | 70.46%     |
|                      | Gene map rate               | 76.87%              | 68.47%     | 75.92%               | 71.26%     |
|                      | Expressed gene              | 22,796              | 22,639     | 22,825               | 22,725     |
|                      | Novel gene                  | 775                 | 761        | 795                  | 705        |
|                      | Alternative splicing        | 32,482              | 32,689     | 33,706               | 32,965     |
|                      | Total reads apped to genome | 75.49%              | 67.89%     | 75.87%               | 70.46%     |
|                      | Perfect match to genome     | 63.00%              | 55.52%     | 62.61%               | 57.41%     |
|                      | Mismatch to genome          | 12.49%              | 12.38%     | 13.26%               | 13.05%     |
|                      | Unique match to genome      | 74.32%              | 66.85%     | 74.79%               | 69.46%     |
| Total Unmapped reads | 24.51%                      | 32.11%              | 24.13%     | 29.54%               |            |
| sRNA-seq             | Clean reads                 | 31,192,441          | 34,969,928 | 33,000,743           | 33,125,499 |
|                      | snRNA                       | 233,962             | 413,635    | 360,602              | 416,831    |
|                      | rRNA                        | 15,246,656          | 16,245,295 | 18,695,564           | 17,611,875 |
|                      | snoRNA                      | 88,371              | 112,863    | 90,081               | 138,206    |
|                      | Repeat                      | 52,8140             | 318,782    | 427,681              | 310,377    |
|                      | miRNA                       | 339,025             | 165,398    | 219,845              | 143,398    |
|                      | tRNA                        | 655,213             | 715,878    | 642,906              | 712,388    |

<https://doi.org/10.1371/journal.pone.0206765.t001>

382 (1.6%), 333 (1.4%), 357 (1.5%) and 372 (1.5%) genes were uniquely presented in MM\_H<sub>2</sub>O, MM\_FOL, Mot\_H<sub>2</sub>O and Mot\_FOL library, respectively (Fig 2A and S1 Table).

By sRNA-seq, we collected a total of more than 132.2 million high quality clean reads including 31.2 million from MM\_H<sub>2</sub>O, 35.0 million from MM\_FOL, 33.0 million from Mot\_H<sub>2</sub>O, and 33.1 million from Mot\_FOL, respectively. Valid sequences were classified according to the genomic regions matched. The composition of sRNA pool was comprehensive and contained a huge portion of other non-coding RNA species including snRNA, rRNA, snoRNA, repeat, miRNA and tRNA. Of these sRNA, we detected 339,025 miRNAs from MM\_H<sub>2</sub>O, 165,398 from MM\_FOL, 219,845 from Mot\_H<sub>2</sub>O, and 143,398 from Mot\_FOL (Tables 1 and S1). Synchronously, a venny diagram was recruited to demonstrate the distribution of miRNAs among the four comparisons. To known miRNAs, we present that the majority of known miRNAs were overlapped among these four libraries (Fig 2B). To novel miRNAs, however, there were 341 (24.5%), 238 (17.1%), 291 (20.9%) and 195 (14%) miRNAs altered the expression uniquely in four libraries respectively (Fig 2C).

### Analysis of differentially expressed (DE) mRNAs and miRNAs and functional classification of DEGs by gene ontology (GO) enrichment analysis

Differentially expressed genes (DEGs) were defined as genes with fold-change > 2 folds and FDR < 0.01. A total number of 3,942 and 4,168 genes were showed significantly differential expression in MM\_FOL vs. MM\_H<sub>2</sub>O library and Mot\_FOL vs. Mot\_H<sub>2</sub>O library, respectively. A majority of these DEGs were overlapped in both water and FOL treated two tomato cultivars. Among these DEGs, 221 were down-regulated in MM\_FOL vs. MM\_H<sub>2</sub>O and 219 were down-regulated in Mot\_FOL vs. Mot\_H<sub>2</sub>O, while 261 were up-regulated in MM\_FOL vs. MM\_H<sub>2</sub>O and 415 up-regulated in Mot\_FOL vs. Mot\_H<sub>2</sub>O (Fig 3, detailed in S1 Table).

Screening of DE miRNAs, the results displayed that the miRNA expression level changed under FOL treatment. The histogram was shown that more miRNAs have altered expression

**A mRNAs**

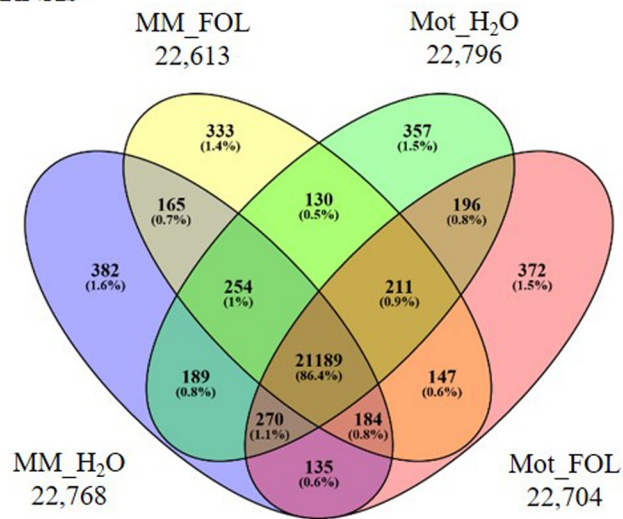

**B Known miRNAs**

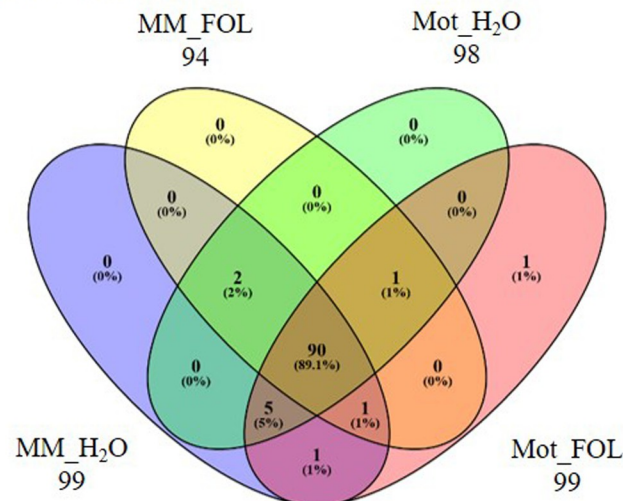

**C Novel miRNAs**

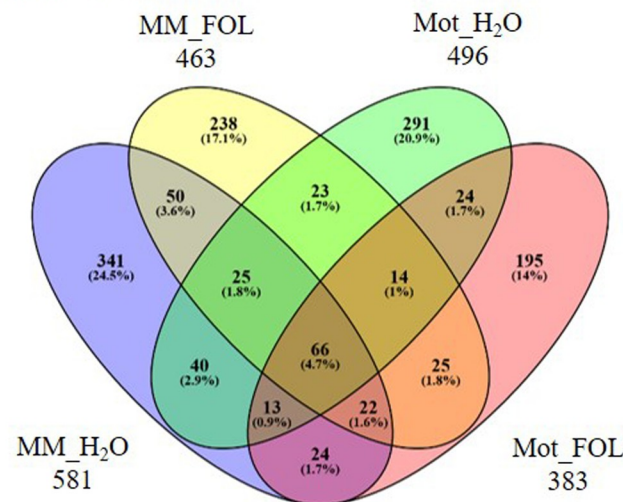

**Fig 2. The Venny diagrams showing the overlaps of mRNA/miRNAs among four comparisons of FOL and water treatment. A mRNAs. B Known miRNAs. C Novel miRNAs.**

<https://doi.org/10.1371/journal.pone.0206765.g002>

after FOL treatment in Motelle sample (18 up-regulated and 31 down-regulated) compared to in Moneymaker sample (16 up-regulated and 66 down-regulated) (Fig 3). Taken together, FOL treatment had a significant impact on global gene/miRNA expression profile in tomato plants.

To explore the distribution of DEGs/DE miRNAs, gene ontology (GO) enrichment analyses were conducted based on these DEGs to elucidate the biological processes/pathways. A total of 530 and 769 GO terms were discovered in MM\_FOL vs. MM\_H<sub>2</sub>O and Mot\_FOL vs. Mot\_H<sub>2</sub>O library, respectively, correlated with three main classes: Biological Processes, Cellular Component, and Molecular Function. GO enrichment analysis revealed that GO terms were mainly classified into catalytic activity (104 out of 530 in MM\_FOL vs. MM\_H<sub>2</sub>O library, and 141 out of 769 in Mot\_FOL vs. Mot\_H<sub>2</sub>O library) (the same define in the following text), metabolic process (81 out of 530, and 118 out of 769), and binding (72 out of 530, and 104 out of 769). Within the response to stimulus, however, no significant change was presented between these two libraries (31 out of 530, and 36 out of 769) (Fig 4A and S2 Table). To DE miRNAs, cellular process and metabolic process were the two most represented categories in Biological Process, being associated with 23.8% of the coding regions of Moneymaker, and 20.8% of the coding regions of Motelle. The cell and cell part category were associated with 21.7% of the transcripts in Moneymaker, and 22.6% in Motelle, being the two most represented in the Cellular Component class. The majority of the transcripts were found to be annotated with the binding category and catalytic activity in Molecular Function, with 19.9% of the transcripts in Moneymaker and 20.8% in Motelle (Fig 4B and S3 Table). It was worthy to note that when generally compared the two deep sequencing results (RNA-seq and sRNA-seq), we found that there were more regulated transcripts responding to FOL invasion in Motelle than that of in Moneymaker, on the contrary, more regulated miRNAs responding to FOL invasion in Moneymaker than that of in Motelle.

### The profiles and expressions of DEGs in pathogen resistance pathway between susceptible and resistant tomato plants

To further understand the biological functions, the pathway enrichment of DEGs were performed to discover the effect of FOL to host plant. Be worth mentioning, the plant-pathogen

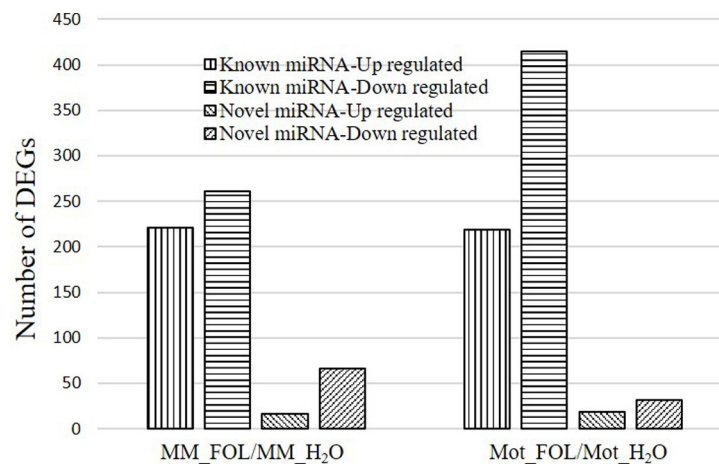

**Fig 3. Statistics of differentially expressed miRNAs between FOL and water treatment.**

<https://doi.org/10.1371/journal.pone.0206765.g003>



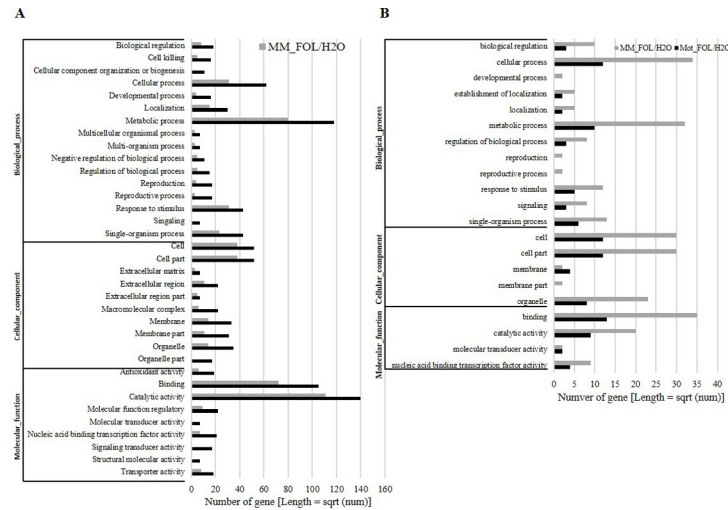

**Fig 4. Functional categorization of significantly differentially expressed mRNA and miRNA under FOL invasion in tomato.** The results were basically summarized into three main categories: biological processes, cellular components, and molecular functions. All statistically significant genes from four libraries were assigned to GO terms. A mRNA from RNA-seq. B Targets of miRNAs from sRNA-seq.

<https://doi.org/10.1371/journal.pone.0206765.g004>

pathway was ranked in the 29<sup>th</sup> (24 out of 356 DEGs) in MM\_FOL vs. MM\_H<sub>2</sub>O group (Detailed in [S4 Table](#)), however, it was presented in the 8<sup>th</sup> (40 out of 469 DEGs) in Mot\_FOL vs. Mot\_H<sub>2</sub>O group (Detailed in [S5 Table](#)). These results may indicated that more pathogen resistance genes were regulated in resistant cultivar Motelle than that in susceptible cultivar Moneymaker. To summarize, these DEGs included genes encoding WRKY protein (8 genes), receptor kinase (20 genes), MYB transcription factor (7 genes), NBS-ARC protein (18 genes), Calmodulin-like protein (9 genes), MAPK (2 genes) and others (7 genes). Intriguingly, seventeen DEGs were regulated in both Moneymaker and Motelle. ([Table 2](#)).

**Table 2. Detail information of regulated genes involved in the plant-pathogen interaction pathway.**

| Pathway                    | Annotation                          | Target genes involved in the pathway                                                                                                                                                                                                                                                                                                    |
|----------------------------|-------------------------------------|-----------------------------------------------------------------------------------------------------------------------------------------------------------------------------------------------------------------------------------------------------------------------------------------------------------------------------------------|
| Plant-pathogen interaction | WRKY transcription factor (8 genes) | Solyc04g072070, <b>Solyc01g095630</b> , <b>Solyc06g068460</b> , Solyc10g011910, Solyc08g067340, Solyc08g008280, Solyc09g015770, Solyc06g066370.                                                                                                                                                                                         |
|                            | Receptor kinase (20 genes)          | Solyc06g062450, <b>Solyc03g059080</b> , Solyc07g054120, Solyc04g074000, Solyc04g014400, Solyc03g098400, Solyc01g013880, Solyc01g016370, Solyc03g082780, Solyc12g040740, Solyc12g100020, Solyc01g096350, Solyc04g009040, Solyc05g055190, Solyc06g076910, Solyc12g009520, Solyc12g009730, Solyc12g009740, Solyc12g009750, Solyc12g013680. |
|                            | MYB transcription factor (7 genes)  | <b>Solyc03g005570</b> , Solyc10g005460, Solyc12g099120, Solyc12g008670, Solyc04g079360, Solyc11g073120, Solyc02g092930.                                                                                                                                                                                                                 |
|                            | NBS-ARC protein (18 genes)          | <b>Solyc00g174340</b> , <b>Solyc09g007020</b> , Solyc00g174330, Solyc07g006710, Solyc09g007010, Solyc00g102400, Solyc02g084890, Solyc04g009090, Solyc04g009150, Solyc04g026110, Solyc05g008650, Solyc09g098130, Solyc10g047320, Solyc11g020100, Solyc11g069020, Solyc06g048910, Solyc08g007250, Solyc09g098130.                         |
|                            | Calmodulin-like protein (9 genes)   | <b>Solyc11g071750</b> , <b>Solyc11g071740</b> , Solyc03g044900, <b>Solyc10g006660</b> , <b>Solyc02g094000</b> , <b>Solyc02g091500</b> , <b>Solyc10g006700</b> , Solyc03g118810, Solyc04g008000.                                                                                                                                         |
|                            | MAPK (2 genes)                      | Solyc05g008020, Solyc06g005170.                                                                                                                                                                                                                                                                                                         |
|                            | Others (7 genes)                    | Solyc09g083050, Solyc03g005320, <b>Solyc05g050350</b> , <b>Solyc05g050380</b> , <b>Solyc01g094910</b> , <b>Solyc11g071760</b> , <b>Solyc00g026160</b> .                                                                                                                                                                                 |

Genes (bold) were regulated in both Moneymaker and Motelle. Genes (underlined) were further analyzed by qRT-PCR.

<https://doi.org/10.1371/journal.pone.0206765.t002>

In the plant-pathogen interaction pathway, nine predicted disease related DEGs, regulated in both Moneymaker and Motelle, were selected to characterize the gene expression profiles by qRT-PCR using primers listed in S8 Table. These DEGs included Solyc01g095630 (SIWRKY41), Solyc06g068460 (SIWRKY40), Solyc03g059080 (Receptor-like serine/threonine protein kinase), Solyc03g005570 (Myb-related transcription factor), Solyc00g174340 (Pathogenesis-related protein 1b), Solyc09g007020 (Pathogenesis-related protein), Solyc11g071750 (Calmodulin-like protein), Solyc10g006660 (Calcium-binding EF hand family protein) and Solyc05g050350 (Cyclic nucleotide gated channel). The results of qRT-PCR showed the similar pattern to sequencing results with minute difference. In detail, Solyc01g095630, Solyc03g059080, Solyc00g174340, Solyc11g071750 and Solyc05g050350 were induced greatly in resistant cultivar Motelle affected by FOL, however, no significant changes were presented in susceptible cultivar Moneymaker between FOL and water treatment. Solyc06g068460 was induced in both Moneymaker and Motelle upon FOL treatment. On the other hand, Solyc11g071750 and Solyc10g006660 were suppressed in both Moneymaker and Motelle plants when treated with FOL (Fig 5).

### MiRNA expression patterns responding to FOL infection and experimental validation of miRNA by Northern blot

We predicted the targets of known and novel miRNAs with the number 1179 and 2615, respectively (S6 Table). In total, thirty-two miRNA families were detected in all libraries in both Moneymaker and Motelle under FOL infection (Detailed in S7 Table). Of these miRNA families, eleven miRNA families were expressed specifically in *Solanaceae* plants. Among these

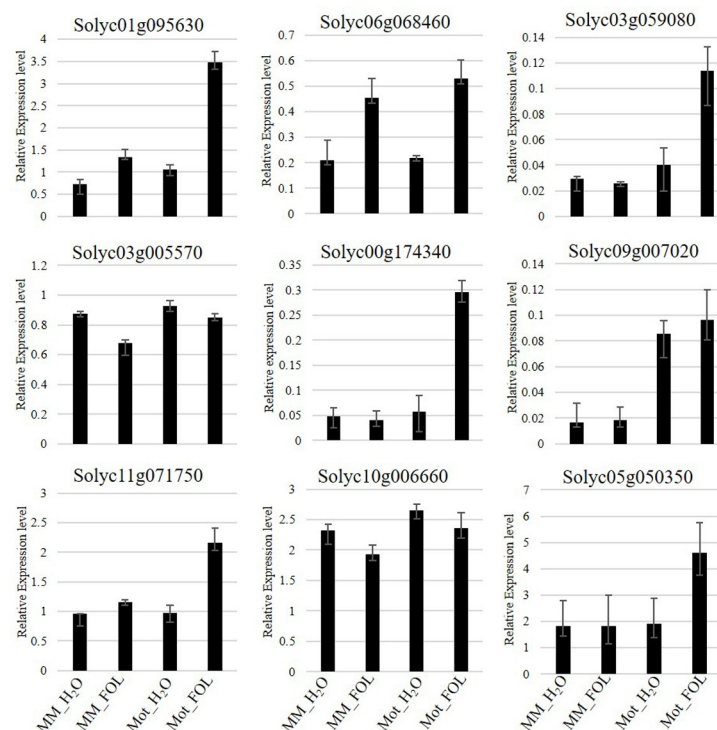

**Fig 5. Validation of differentially expressed genes selected in plant-pathogen interaction pathway by qRT-PCR.** Total tomato root RNA was reverse transcribed to cDNA used as template for qRT-PCR with gene-specific primers. Each column represents an average of three replicates, and error bars represent the standard error of means.

<https://doi.org/10.1371/journal.pone.0206765.g005>

specific expressed miRNA families, five of them, including miR6022, miR6023, miR6026, miR6027 and miR6024, were predicted to associate with plant innate immune receptors which were listed in Table 3.

To further characterize the miRNAs expression patterns, we identified twenty-two miRNAs up or down-regulated in both Moneymaker and Motelle under FOL/water treatment (Fig 6). To test the reliability of our sRNA-Seq data, Northern blot analysis was performed on nine miRNAs (sly-miR160a, sly-miR477-5p, sly-miR167a, novel\_mir\_273, novel\_mir\_469, novel\_mir\_365, novel\_mir\_675, novel\_mir\_504 and novel\_mir\_762) using primers listed in S8 Table (Detail sequences of novel miRNAs were presented in S9 Table). Our data indicated that sly-miR477-5p, sly-miR167a, novel\_mir\_675, novel\_mir\_504 and novel\_mir\_762 were repressed congruously in both Moneymaker and Motelle when treated with FOL. Novel\_mir\_365 and novel\_mir\_469 were slightly up-regulated in Motelle under FOL invasion (Fig 7). These data displayed a credible consistence with the results of sRNA-seq.

### Discussion

In the present study, we explored a global transcriptomic profile of tomato-FOL interaction through four different treatments. The components of plant response to pathogen challenging may lead to understand the potential defense mechanisms. Plants have evolved a complicate defense system against pathogens including cascade signaling activation, the regulation of gene expression, synthesis of defensive metabolites as well as hormone balancing [37, 38]. So far, by taking advantage of high-throughput RNA sequencing (RNA-seq) approach, a few of transcriptome studies discovering the host-FOL interaction have been reported in banana, watermelon, mango and *Arabidopsis* [10–12, 14, 15], shedding light on the cross-talking among different signaling pathways involving in plant-pathogen interaction.

When plant is attacked by pathogen, the host reprograms metabolism balance between development and the resources to support defense to pathogen, involving biological process, cellular components and molecular functions [39]. Based on our results, the tomato-FOL interaction basically follows the typical reaction of necrotrophic pathogens infection. Gene Ontology analysis of DEGs between two tomato cultivars reveals specific enriched categories in both interactions. In resistant tomato cultivar Motelle, cellular component organization or biogenesis, signaling, molecular transducer activity, and signal transducer activity were

**Table 3. Function description of miRNA families especially presented in the nightshade family (*Solanaceae* plant).**

| miRNA family | Member                                                             | Annotation                                                                                                 | Number of Targets | Reference |
|--------------|--------------------------------------------------------------------|------------------------------------------------------------------------------------------------------------|-------------------|-----------|
| miR5302      | sly-miR5302a, sly-miR5302b-5p, sly-miR5302b-3p                     | Regulate genes involved in fleshy fruit development                                                        | 37                | [62]      |
| miR5303      | sly-miR5303                                                        | Regulate genes involved in fleshy fruit development                                                        | 42                | [62]      |
| miR5304      | sly-miR5304                                                        | Regulate genes involved in fleshy fruit development                                                        | 1                 | [62]      |
| miR4376      | sly-miR4376                                                        | Regulating the expression of an autoinhibited Ca <sup>2+</sup> -ATPase lead to tomato reproductive growth. | 1                 | [63]      |
| miR6022      | sly-miR6022                                                        | Regulation of plant innate immune receptors.                                                               | 18                | [64]      |
| miR6023      | sly-miR6023                                                        | Regulation of plant innate immune receptors.                                                               | 32                | [64]      |
| miR6024      | sly-miR6024                                                        | Regulation of plant innate immune receptors.                                                               | 48                | [64]      |
| miR6026      | sly-miR6026                                                        | Regulation of plant innate immune receptors.                                                               | 15                | [64]      |
| miR6027      | sly-miR6027-5p, sly-miR6027-3p                                     | Regulation of plant innate immune receptors.                                                               | 29                | [64]      |
| miR1919      | sly-miR1919a, sly-miR1919b, sly-miR1919c-3p                        | Not annotated on reference assembly.                                                                       | 4                 | -         |
| miR9471      | sly-miR9471a-5p, sly-miR9471a-3p, sly-miR9471b-5p, sly-miR9471b-3p | Not annotated on reference assembly.                                                                       | 6                 | -         |

<https://doi.org/10.1371/journal.pone.0206765.t003>

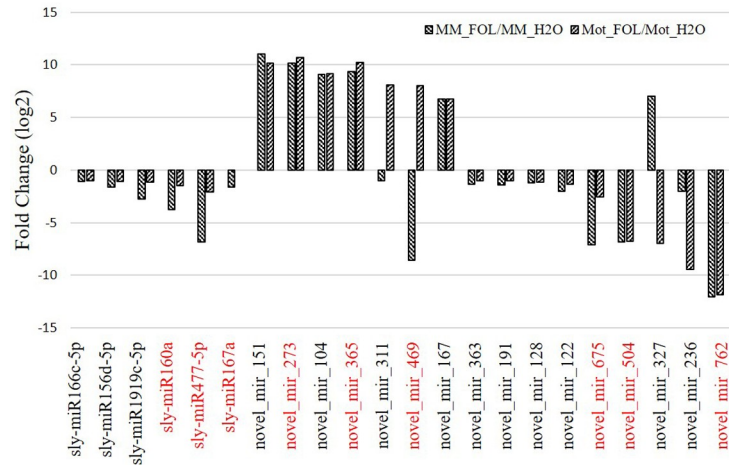

**Fig 6. Profiling of miRNAs response to FOL in tomato plants.** According to sRNA-seq analysis, partial of regulated miRNAs were summarized by normalizing reads of water treatment for each cultivar.

<https://doi.org/10.1371/journal.pone.0206765.g006>

evidenced when compared to susceptible tomato cultivar Moneymaker. Among them, cellular component organization and biogenesis are critical metabolic activities required by plants to survive under fungus-inflicted stresses [40]. Generally, the genes involved in GO analysis

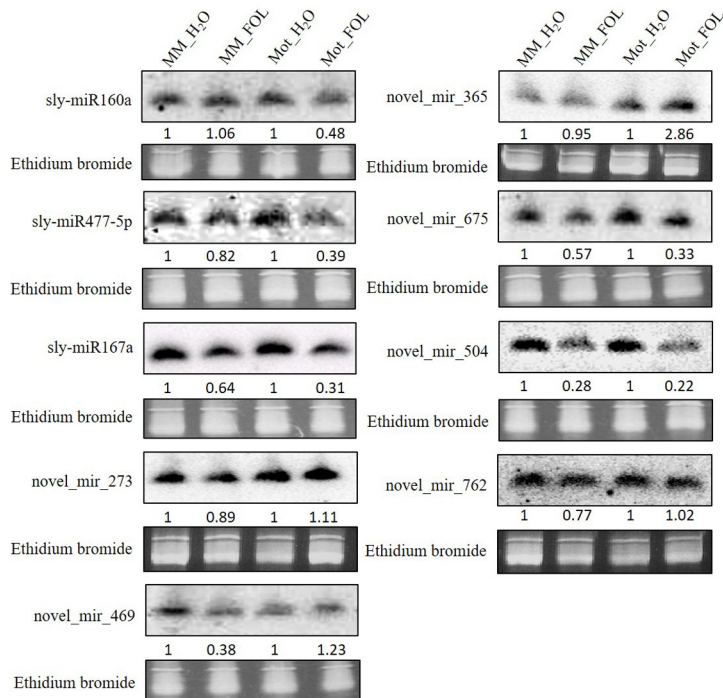

**Fig 7. Expression validation of selected miRNAs by Northern blot analysis.** MiRNAs including known and novel highlighted with red in Fig 6 were selected randomly for Northern blot analysis. Total root RNA samples (10 µg) were from four treatments. Gel staining with ethidium bromide were used as loading control for each blot. Blots were imaged using a Phosphorimager. Using ImageJ software to measure the grey density, the numbers below each blot present the relative enrichment of individual miRNA in each treatment normalized to the corresponding water-treated control.

<https://doi.org/10.1371/journal.pone.0206765.g007>

present in Motelle more than in Moneymaker upon FOL infection which may due to different resistant cultivar.

Two main mechanisms, pathogen-associated molecular patterns (PAMPs) [41–43] and the adaptive immune system composed of resistant (*R*) genes [44–46], are involved in plant responses to pathogenic microorganisms in plant. At least five different classes of *R* genes have been classified based on functional domain [46]. Among these classes, a nucleotide-binding site (NBS) and leucine-rich repeats (LRRs) (NBS-LRR) is known as the most numerous *R*-gene class [45]. Previously, we reported that tomato endogenic miRNA *slmiR482f* and *slmiR5300* conferred tomato wilt disease resistance. The targets of both miRNAs were, predicted encoding protein with full or partial NBS domains respectively, confirmed to exhibit function of resistance to FOL [27, 28]. A few of investigations have been demonstrated that NBS-LRR proteins recognize a specific Avr protein and display disease resistance in several plant species, including rice, tomato, *N. benthamiana*, *Arabidopsis* and wheat [47–51]. Transcriptional regulation of defense genes has been known as a central in plant defense responses. Certain a few of plant TF families, such as AP2/ERF, bHLH, TGA/bZIP, MYB, NAC and WRKY, appear to be prominent regulators of host defense [52, 53]. Several MYB proteins, including AtMYB30, AtMYB44, AtMYB108/BOS1 and HvMYB6, demonstrate resistant functions in plant immunity [54]. However, there was no reported MYB protein conferring disease resistance in tomato species.

It is well-established that miRNA is one of the plant produced two major classes of endogenous small RNAs, mediating sequence-dependent post-transcriptional gene silencing (PTGS) by guiding mRNA cleavage and/or translation inhibition. In the past decades, genome-wide small RNA analyses using sRNA-seq approach have been conducted for several plant-filamentous pathogen interactions [27, 55–57]. However, so far, only miR482/2118 superfamily has been elucidated for the disease resistance function in tomato [27, 58]. From our sRNA-seq data, a common set of plant innate immunity miRNAs were regulated after FOL infection in both susceptible and resistant tomato plant. Not surprised, more miRNAs were presented to respond to FOL invasion in Motelle than that of in Moneymaker. Further potential target prediction results by online tool psRNATarget indicated that a few of these targets were pathogen resistant or related genes. For example, *sly-miR160a* and *novel\_mir\_762* target several Auxin response factors (S10 Table). Auxin is not only an important plant hormone affecting plant development, growth and abiotic stress, but also a new functional molecular to attenuate pathogens virulence [59–61]. Although the high throughput sequencing technology used to characterize the sRNA component did not enable an accurate quantitative evaluation, our bioinformatics analysis combining northern blot confirmed several novel miRNAs conferring FOL infection in tomato, which offered us with an exciting further direction to investigate the role of miRNAs in resistance to FOL in tomato.

To conclude, by integrative analysis, our broad genome transcriptome RNA-seq/sRNA-seq data provide a comprehensive overview of the gene expression profiles of tomato treated with FOL. Our results identified several disease resistance related genes/miRNAs. It will facilitate further analysis of putative molecular mechanism of resistance in tomato leading to the improvement of tomato wilt disease control strategies.

## Supporting information

### S1 Table. All gene FPKM.

(XLSX)

### S2 Table. GO Classification of mRNA.

(XLSX)



**S3 Table. GO Classification of miRNA.**

(XLSX)

**S4 Table. GO pathway enrichment of DEGs\_MM.**

(XLSX)

**S5 Table. GO pathway enrichment of DEGs\_Mot.**

(XLSX)

**S6 Table. List of targets of all miRNAs.**

(XLSX)

**S7 Table. GO miRNA family analysis.**

(XLSX)

**S8 Table. Primer sequences used in this study.**

(DOC)

**S9 Table. Targets of verified miRNA.**

(XLSX)

**S10 Table. The targets of confirmed miRNAs in this study.**

(XLSX)

## Acknowledgments

We are indebted to Dr. Katherine A. Borkovich for advice on small RNA library construction and Dr. Isgouhi Kaloshian (both from University California, Riverside, CA, USA) for two tomato cultivars.

## Author Contributions

**Conceptualization:** Shou-Qiang Ouyang, Peng Liu.

**Data curation:** Min Zhao, Hui-Min Ji.

**Formal analysis:** Ying Gao.

**Funding acquisition:** Shou-Qiang Ouyang.

**Investigation:** Min Zhao, Hui-Min Ji, Xin-Xin Cao, Hui-Ying Mao.

**Project administration:** Peng Liu.

**Resources:** Hui-Ying Mao.

**Software:** Ying Gao.

**Validation:** Xin-Xin Cao.

**Writing – original draft:** Shou-Qiang Ouyang.

**Writing – review & editing:** Peng Liu.

## References

1. Di Pietro A, Roncero MI. Cloning, expression, and role in pathogenicity of pg1 encoding the major extracellular endopolygalacturonase of the vascular wilt pathogen *Fusarium oxysporum*. *Mol Plant Microbe Interact*. 1998; 11(2):91–8. <https://doi.org/10.1094/MPMI.1998.11.2.91> PMID: 9450333.

2. Takken F, Rep M. The arms race between tomato and *Fusarium oxysporum*. *Mol Plant Pathol*. 2010; 11(2):309–14. <https://doi.org/10.1111/j.1364-3703.2009.00605.x> PubMed PMID: WOS:000273902500013. PMID: 20447279
3. Ori N, Eshed Y, Paran I, Presting G, Aviv D, Tanksley S, et al. The I2C family from the wilt disease resistance locus I2 belongs to the nucleotide binding, leucine-rich repeat superfamily of plant resistance genes. *Plant Cell*. 1997; 9(4):521–32. <https://doi.org/10.1105/tpc.9.4.521> PMID: 9144960; PubMed Central PMCID: PMC156936.
4. Simons G, Groenendijk J, Wijbrandi J, Reijans M, Groenen J, Diergaarde P, et al. Dissection of the fusarium I2 gene cluster in tomato reveals six homologs and one active gene copy. *Plant Cell*. 1998; 10(6):1055–68. PMID: 9634592; PubMed Central PMCID: PMC144031.
5. Catanzariti AM, Lim GT, Jones DA. The tomato I-3 gene: a novel gene for resistance to *Fusarium* wilt disease. *New Phytol*. 2015; 207(1):106–18. <https://doi.org/10.1111/nph.13348> PMID: 25740416.
6. Gonzalez-Cendales Y, Catanzariti AM, Baker B, McGrath DJ, Jones DA. Identification of I-7 expands the repertoire of genes for resistance to *Fusarium* wilt in tomato to three resistance gene classes. *Mol Plant Pathol*. 2016; 17(3):448–63. <https://doi.org/10.1111/mpp.12294> PMID: 26177154.
7. Houterman PM, Ma L, van Ooijen G, de Vroomen MJ, Cornelissen BJ, Takken FL, et al. The effector protein Avr2 of the xylem-colonizing fungus *Fusarium oxysporum* activates the tomato resistance protein I-2 intracellularly. *Plant J*. 2009; 58(6):970–8. <https://doi.org/10.1111/j.1365-3113X.2009.03838.x> PMID: 19228334.
8. de Ilarduya OM, Moore AE, Kaloshian I. The tomato Rme1 locus is required for Mi-1-mediated resistance to root-knot nematodes and the potato aphid. *Plant J*. 2001; 27(5):417–25. PMID: 11576426.
9. Yu SC, Zou YM. [A co-dominant molecular marker of fusarium wilt resistance gene I-2 derived from gene sequence in tomato]. *Yi Chuan*. 2008; 30(7):926–32. PMID: 18779138.
10. Guo L, Han L, Yang L, Zeng H, Fan D, Zhu Y, et al. Genome and transcriptome analysis of the fungal pathogen *Fusarium oxysporum* f. sp. *cubense* causing banana vascular wilt disease. *PLoS One*. 2014; 9(4):e95543. <https://doi.org/10.1371/journal.pone.0095543> PMID: 24743270; PubMed Central PMCID: PMC13990668.
11. Xing M, Lv H, Ma J, Xu D, Li H, Yang L, et al. Transcriptome Profiling of Resistance to *Fusarium oxysporum* f. sp. *conglutinans* in Cabbage (*Brassica oleracea*) Roots. *PLoS One*. 2016; 11(2):e0148048. <https://doi.org/10.1371/journal.pone.0148048> PMID: 26849436; PubMed Central PMCID: PMC1444058.
12. Liu N, Yang J, Fu X, Zhang L, Tang K, Guy KM, et al. Genome-wide identification and comparative analysis of grafting-responsive mRNA in watermelon grafted onto bottle gourd and squash rootstocks by high-throughput sequencing. *Mol Genet Genomics*. 2016; 291(2):621–33. <https://doi.org/10.1007/s00438-015-1132-5> PMID: 26500104.
13. Liu F, Wu JB, Zhan RL, Ou XC. Transcription Profiling Analysis of Mango-*Fusarium mangiferae* Interaction. *Front Microbiol*. 2016; 7:1443. <https://doi.org/10.3389/fmicb.2016.01443> PMID: 27683574; PubMed Central PMCID: PMC15022174.
14. Chen YC, Wong CL, Muzzi F, Vlaardingerbroek I, Kidd BN, Schenk PM. Root defense analysis against *Fusarium oxysporum* reveals new regulators to confer resistance. *Sci Rep*. 2014; 4:5584. <https://doi.org/10.1038/srep05584> PMID: 24998294; PubMed Central PMCID: PMC14083284.
15. Gupta KJ, Mur LA, Brotman Y. *Trichoderma asperelloides* suppresses nitric oxide generation elicited by *Fusarium oxysporum* in *Arabidopsis* roots. *Mol Plant Microbe Interact*. 2014; 27(4):307–14. <https://doi.org/10.1094/MPMI-06-13-0160-R> PMID: 24283937.
16. Llave C, Kasschau KD, Rector MA, Carrington JC. Endogenous and silencing-associated small RNAs in plants. *Plant Cell*. 2002; 14(7):1605–19. <https://doi.org/10.1105/tpc.003210> PMID: 12119378; PubMed Central PMCID: PMC150710.
17. Llave C, Xie Z, Kasschau KD, Carrington JC. Cleavage of Scarecrow-like mRNA targets directed by a class of *Arabidopsis* miRNA. *Science*. 2002; 297(5589):2053–6. <https://doi.org/10.1126/science.1076311> PMID: 12242443.
18. Reinhart BJ, Slack FJ, Basson M, Pasquinelli AE, Bettinger JC, Rougvie AE, et al. The 21-nucleotide let-7 RNA regulates developmental timing in *Caenorhabditis elegans*. *Nature*. 2000; 403(6772):901–6. <https://doi.org/10.1038/35002607> PMID: 10706289.
19. Brodersen P, Sakvarelidze-Achard L, Bruun-Rasmussen M, Dunoyer P, Yamamoto YY, Sieburth L, et al. Widespread translational inhibition by plant miRNAs and siRNAs. *Science*. 2008; 320(5880):1185–90. <https://doi.org/10.1126/science.1159151> PMID: 18483398.
20. Sunkar R, Kapoor A, Zhu JK. Posttranscriptional induction of two Cu/Zn superoxide dismutase genes in *Arabidopsis* is mediated by downregulation of miR398 and important for oxidative stress tolerance. (vol 18, pg 2051, 2006). *Plant Cell*. 2006; 18(9):2415–. <https://doi.org/10.1105/tpc.106.180960> PubMed PMID: WOS:000240463600026.

21. Sunkar R, Chinnusamy V, Zhu JH, Zhu JK. Small RNAs as big players in plant abiotic stress responses and nutrient deprivation. *Trends Plant Sci.* 2007; 12(7):301–9. <https://doi.org/10.1016/j.tplants.2007.05.001> PubMed PMID: WOS:000248466400006. PMID: 17573231
22. Padmanabhan C, Zhang XM, Jin HL. Host small RNAs are big contributors to plant innate immunity. *Curr Opin Plant Biol.* 2009; 12(4):465–72. <https://doi.org/10.1016/j.pbi.2009.06.005> PubMed PMID: WOS:000269384900012. PMID: 19608454
23. Qiao YL, Liu L, Xiong Q, Flores C, Wong J, Shi JX, et al. Oomycete pathogens encode RNA silencing suppressors. *Nat Genet.* 2013; 45(3):330–3. <https://doi.org/10.1038/ng.2525> PubMed PMID: WOS:000315664800021. PMID: 23377181
24. Weiberg A, Wang M, Lin FM, Zhao HW, Zhang ZH, Kaloshian I, et al. Fungal Small RNAs Suppress Plant Immunity by Hijacking Host RNA Interference Pathways. *Science.* 2013; 342(6154):118–23. <https://doi.org/10.1126/science.1239705> PubMed PMID: WOS:000325126100059. PMID: 24092744
25. Robert-Seilaniantz A, MacLean D, Jikumaru Y, Hill L, Yamaguchi S, Kamiya Y, et al. The microRNA miR393 re-directs secondary metabolite biosynthesis away from camalexin and towards glucosinolates. *Plant Journal.* 2011; 67(2):218–31. <https://doi.org/10.1111/j.1365-313X.2011.04591.x> PubMed PMID: WOS:000292700900003. PMID: 21457368
26. Wong J, Gao L, Yang Y, Zhai JX, Arikat S, Yu Y, et al. Roles of small RNAs in soybean defense against *Phytophthora sojae* infection. *Plant Journal.* 2014; 79(6):928–40. <https://doi.org/10.1111/tpj.12590> PubMed PMID: WOS:000341515600004. PMID: 24944042
27. Ouyang SQ, Park G, Atamian HS, Han CS, Stajich JE, Kaloshian I, et al. MicroRNAs Suppress NB Domain Genes in Tomato That Confer Resistance to *Fusarium oxysporum*. *Plos Pathogens.* 2014; 10(10). doi: ARTN e1004464 <https://doi.org/10.1371/journal.ppat.1004464> PubMed PMID: WOS:000344548800051. PMID: 25330340
28. Ji HM, Zhao M, Gao Y, Cao XX, Mao HY, Zhou Y, et al. FRG3, a Target of *slmiR482e-3p*, Provides Resistance against the Fungal Pathogen *Fusarium oxysporum* in Tomato. *Frontiers in Plant Science.* 2018; 9. doi: ARTN 26 <https://doi.org/10.3389/fpls.2018.00026> PubMed PMID: WOS:000423349500001. PMID: 29434609
29. Langmead B, Trapnell C, Pop M, Salzberg SL. Ultrafast and memory-efficient alignment of short DNA sequences to the human genome. *Genome Biol.* 2009; 10(3):R25. <https://doi.org/10.1186/gb-2009-10-3-r25> PMID: 19261174; PubMed Central PMCID: PMCPMC2690996.
30. Axtell MJ, Meyers BC. Revisiting Criteria for Plant MicroRNA Annotation in the Era of Big Data. *Plant Cell.* 2018; 30(2):272–84. <https://doi.org/10.1105/tpc.17.00851> PMID: 29343505; PubMed Central PMCID: PMCPMC5868703.
31. Trapnell C, Roberts A, Goff L, Pertea G, Kim D, Kelley DR, et al. Differential gene and transcript expression analysis of RNA-seq experiments with TopHat and Cufflinks. *Nat Protoc.* 2012; 7(3):562–78. <https://doi.org/10.1038/nprot.2012.016> PMID: 22383036; PubMed Central PMCID: PMCPMC3334321.
32. Trapnell C, Williams BA, Pertea G, Mortazavi A, Kwan G, van Baren MJ, et al. Transcript assembly and quantification by RNA-Seq reveals unannotated transcripts and isoform switching during cell differentiation. *Nat Biotechnol.* 2010; 28(5):511–U174. <https://doi.org/10.1038/nbt.1621> PubMed PMID: WOS:000277452700032. PMID: 20436464
33. Jannot AS, Ehret G, Perneger T.  $P < 5 \times 10^{-8}$  has emerged as a standard of statistical significance for genome-wide association studies. *J Clin Epidemiol.* 2015; 68(4):460–5. <https://doi.org/10.1016/j.jclinepi.2015.01.001> PMID: 25666886.
34. Ruepp A, Zollner A, Maier D, Albermann K, Hani J, Mokrejs M, et al. The FunCat, a functional annotation scheme for systematic classification of proteins from whole genomes. *Nucleic Acids Res.* 2004; 32(18):5539–45. <https://doi.org/10.1093/nar/gkh894> PMID: 15486203; PubMed Central PMCID: PMCPMC524302.
35. Smoot ME, Ono K, Ruscheinski J, Wang PL, Ideker T. Cytoscape 2.8: new features for data integration and network visualization. *Bioinformatics.* 2011; 27(3):431–2. <https://doi.org/10.1093/bioinformatics/btq675> PMID: 21149340; PubMed Central PMCID: PMCPMC3031041.
36. Merico D, Isserlin R, Stueker O, Emili A, Bader GD. Enrichment map: a network-based method for gene-set enrichment visualization and interpretation. *PLoS One.* 2010; 5(11):e13984. <https://doi.org/10.1371/journal.pone.0013984> PMID: 21085593; PubMed Central PMCID: PMCPMC2981572.
37. Mukhtar MS, Carvunis AR, Dreze M, Epple P, Steinbrenner J, Moore J, et al. Independently evolved virulence effectors converge onto hubs in a plant immune system network. *Science.* 2011; 333(6042):596–601. <https://doi.org/10.1126/science.1203659> PMID: 21798943; PubMed Central PMCID: PMCPMC3170753.
38. Andolfo G, Ferriello F, Tardella L, Ferrarini A, Sigillo L, Frusciante L, et al. Tomato genome-wide transcriptional responses to *Fusarium* wilt and Tomato Mosaic Virus. *PLoS One.* 2014; 9(5):e94963. <https://doi.org/10.1371/journal.pone.0094963> PMID: 24804963; PubMed Central PMCID: PMCPMC4012952.

39. Mithofer A, Boland W. Plant defense against herbivores: chemical aspects. *Annu Rev Plant Biol.* 2012; 63:431–50. <https://doi.org/10.1146/annurev-arplant-042110-103854> PMID: 22404468.
40. Paul JY, Becker DK, Dickman MB, Harding RM, Khanna HK, Dale JL. Apoptosis-related genes confer resistance to *Fusarium wilt* in transgenic 'Lady Finger' bananas. *Plant Biotechnol J.* 2011; 9(9):1141–8. <https://doi.org/10.1111/j.1467-7652.2011.00639.x> PMID: 21819535.
41. Boller T, Felix G. A renaissance of elicitors: perception of microbe-associated molecular patterns and danger signals by pattern-recognition receptors. *Annu Rev Plant Biol.* 2009; 60:379–406. <https://doi.org/10.1146/annurev-arplant.57.032905.105346> PMID: 19400727.
42. Cui H, Tsuda K, Parker JE. Effector-triggered immunity: from pathogen perception to robust defense. *Annu Rev Plant Biol.* 2015; 66:487–511. <https://doi.org/10.1146/annurev-arplant-050213-040012> PMID: 25494461.
43. Yang L, Huang H. Roles of small RNAs in plant disease resistance. *J Integr Plant Biol.* 2014; 56(10):962–70. <https://doi.org/10.1111/jipb.12200> PMID: 24667020.
44. van Ooijen G, van den Burg HA, Cornelissen BJ, Takken FL. Structure and function of resistance proteins in solanaceous plants. *Annu Rev Phytopathol.* 2007; 45:43–72. <https://doi.org/10.1146/annurev.phyto.45.062806.094430> PMID: 17367271.
45. Dangl JL, Jones JDG. Plant pathogens and integrated defence responses to infection. *Nature.* 2001; 411(6839):826–33. <https://doi.org/10.1038/35081161> PubMed PMID: WOS:000169246400059. PMID: 11459065
46. Marone D, Russo MA, Laido G, De Leonardis AM, Mastrangelo AM. Plant Nucleotide Binding Site-Leucine-Rich Repeat (NBS-LRR) Genes: Active Guardians in Host Defense Responses. *Int J Mol Sci.* 2013; 14(4):7302–26. <https://doi.org/10.3390/ijms14047302> PubMed PMID: WOS:000318017100036. PMID: 23549266
47. Sinapidou E, Williams K, Nott L, Bahkt S, Tor M, Crute I, et al. Two TIR:NB:LRR genes are required to specify resistance to *Peronospora parasitica* isolate Cala2 in *Arabidopsis*. *Plant J.* 2004; 38(6):898–909. <https://doi.org/10.1111/j.1365-313X.2004.02099.x> PMID: 15165183.
48. Peart JR, Mestre P, Lu R, Malcuit I, Baulcombe DC. NRG1, a CC-NB-LRR protein, together with N, a TIR-NB-LRR protein, mediates resistance against tobacco mosaic virus. *Curr Biol.* 2005; 15(10):968–73. <https://doi.org/10.1016/j.cub.2005.04.053> PMID: 15916955.
49. Loutre C, Wicker T, Travella S, Galli P, Scofield S, Fahima T, et al. Two different CC-NBS-LRR genes are required for Lr10-mediated leaf rust resistance in tetraploid and hexaploid wheat. *Plant J.* 2009; 60(6):1043–54. <https://doi.org/10.1111/j.1365-313X.2009.04024.x> PMID: 19769576.
50. Narusaka M, Shirasu K, Noutoshi Y, Kubo Y, Shiraiishi T, Iwabuchi M, et al. RRS1 and RPS4 provide a dual Resistance-gene system against fungal and bacterial pathogens. *Plant J.* 2009; 60(2):218–26. <https://doi.org/10.1111/j.1365-313X.2009.03949.x> PMID: 19519800.
51. Okuyama Y, Kanzaki H, Abe A, Yoshida K, Tamiru M, Saitoh H, et al. A multifaceted genomics approach allows the isolation of the rice Pia-blast resistance gene consisting of two adjacent NBS-LRR protein genes. *Plant J.* 2011; 66(3):467–79. <https://doi.org/10.1111/j.1365-313X.2011.04502.x> PMID: 21251109.
52. Tsuda K, Somssich IE. Transcriptional networks in plant immunity. *New Phytol.* 2015; 206(3):932–47. <https://doi.org/10.1111/nph.13286> PMID: 25623163.
53. Birkenbihl RP, Liu S, Somssich IE. Transcriptional events defining plant immune responses. *Curr Opin Plant Biol.* 2017; 38:1–9. <https://doi.org/10.1016/j.pbi.2017.04.004> PMID: 28458046.
54. Buscaill P, Rivas S. Transcriptional control of plant defence responses. *Curr Opin Plant Biol.* 2014; 20:35–46. <https://doi.org/10.1016/j.pbi.2014.04.004> PubMed PMID: WOS:000341558000006. PMID: 24840291
55. Inal B, Turktas M, Eren H, Ilhan E, Okay S, Atak M, et al. Genome-wide fungal stress responsive miRNA expression in wheat. *Planta.* 2014; 240(6):1287–98. <https://doi.org/10.1007/s00425-014-2153-8> PubMed PMID: WOS:000344752900011. PMID: 25156489
56. Radwan O, Liu Y, Clough SJ. Transcriptional Analysis of Soybean Root Response to *Fusarium virguliforme*, the Causal Agent of Sudden Death Syndrome. *Mol Plant Microbe In.* 2011; 24(8):958–72. <https://doi.org/10.1094/Mpmi-11-10-0271> PubMed PMID: WOS:000292784300010. PMID: 21751852
57. Baldrich P, Kakar K, Sire C, Moreno AB, Berger A, Garcia-Chapa M, et al. Small RNA profiling reveals regulation of *Arabidopsis* miR168 and heterochromatic siRNA415 in response to fungal elicitors. *Bmc Genomics.* 2014; 15. doi: Artn 1083 <https://doi.org/10.1186/1471-2164-15-15> PubMed PMID: WOS:000346391300001
58. Shivaprasad PV, Chen HM, Patel K, Bond DM, Santos BA, Baulcombe DC. A microRNA superfamily regulates nucleotide binding site-leucine-rich repeats and other mRNAs. *Plant Cell.* 2012; 24(3):859–74. <https://doi.org/10.1105/tpc.111.095380> PMID: 22408077; PubMed Central PMCID: PMC3336131.

59. Robert-Seilaniantz A, Navarro L, Bari R, Jones JD. Pathological hormone imbalances. *Curr Opin Plant Biol.* 2007; 10(4):372–9. <https://doi.org/10.1016/j.pbi.2007.06.003> PMID: 17646123.
60. Spoel SH, Dong X. Making sense of hormone crosstalk during plant immune responses. *Cell Host Microbe.* 2008; 3(6):348–51. <https://doi.org/10.1016/j.chom.2008.05.009> PMID: 18541211.
61. Krishnamurthy P, Mohanty B, Wijaya E, Lee DY, Lim TM, Lin Q, et al. Transcriptomics analysis of salt stress tolerance in the roots of the mangrove *Avicennia officinalis*. *Sci Rep.* 2017; 7(1):10031. <https://doi.org/10.1038/s41598-017-10730-2> PMID: 28855698; PubMed Central PMCID: PMC577154.
62. Mohorianu I, Schwach F, Jing R, Lopez-Gomollon S, Moxon S, Szittya G, et al. Profiling of short RNAs during fleshy fruit development reveals stage-specific sRNAome expression patterns. *Plant J.* 2011; 67(2):232–46. <https://doi.org/10.1111/j.1365-313X.2011.04586.x> PMID: 21443685.
63. Wang Y, Itaya A, Zhong XH, Wu Y, Zhang JF, van der Knaap E, et al. Function and Evolution of a MicroRNA That Regulates a Ca<sup>2+</sup>-ATPase and Triggers the Formation of Phased Small Interfering RNAs in Tomato Reproductive Growth. *Plant Cell.* 2011; 23(9):3185–203. <https://doi.org/10.1105/tpc.111.088013> PubMed PMID: WOS:000296739100013. PMID: 21917547
64. Li F, Pignatta D, Bendix C, Brunkard JO, Cohn MM, Tung J, et al. MicroRNA regulation of plant innate immune receptors. *Proc Natl Acad Sci U S A.* 2012; 109(5):1790–5. <https://doi.org/10.1073/pnas.1118282109> PMID: 22307647; PubMed Central PMCID: PMC3277104.
